# Supplementary material for: Rhynchophylline alleviates neuroinflammation and regulates metabolic disorders in a mouse model of Parkinson's disease
Source: Royal Society of Chemistry journal article supplement (doi:10.1039/d2fo02939a), 2023-01-01
Supplement: d2fo02939a1.pdf [file d2fo02939a1.pdf]

## Supplementary Information

# **Rhynchophylline alleviates neuroinflammation and regulates metabolic disorders in a mouse model of Parkinson's disease**

Chunxia Zhang,<sup>a,b†</sup> Zhen Xue,<sup>a,b†</sup> Lingmeng Zhu,<sup>a,b</sup> Lingfei Han,<sup>a,b</sup> Jiayu Zhou,<sup>a,b</sup>  
Lingxin Zhuo,<sup>a,b</sup> Jiayi Zhang,<sup>a,b</sup> Xinchun Zhang,<sup>a,b</sup> Wenyuan Liu,<sup>\*a,c</sup> Wenting Liao<sup>\*a,b</sup>

<sup>a</sup> *Key Laboratory of Drug Quality Control and Pharmacovigilance, China Pharmaceutical University, Ministry of Education, Nanjing 210009, China*

<sup>b</sup> *Department of Pharmaceutical Analysis, China Pharmaceutical University, Nanjing 210009, China*

<sup>c</sup> *Zhejiang Center for safety study of drug substances (Industrial Technology Innovation Platform), Hangzhou, 310018, China*

†Chunxia Zhang and Zhen Xue made equal contributions to the research.

\*Corresponding authors: Wenting Liao, Email: lwting84@163.com, Tel: +86-25-83271038.

Wenyuan Liu, Email: liuwenyuan8506@163.com, Tel: +86-25-83271038.

## Supplementary Figures

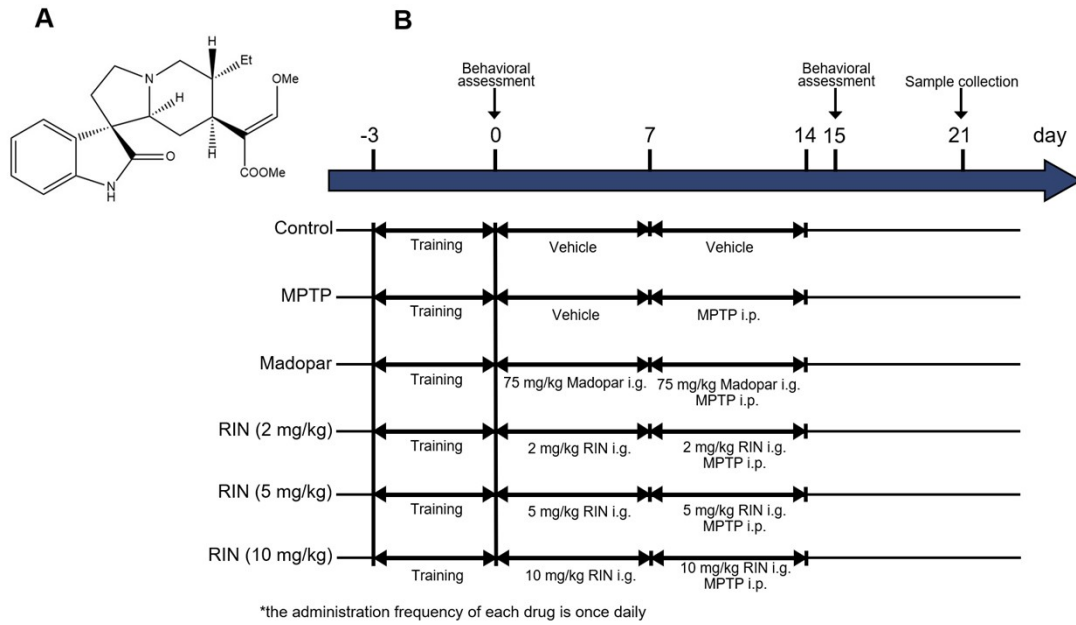

**Fig. S1.** The chemical structure of RIN (A) and the flow chart of animal experiments (B).

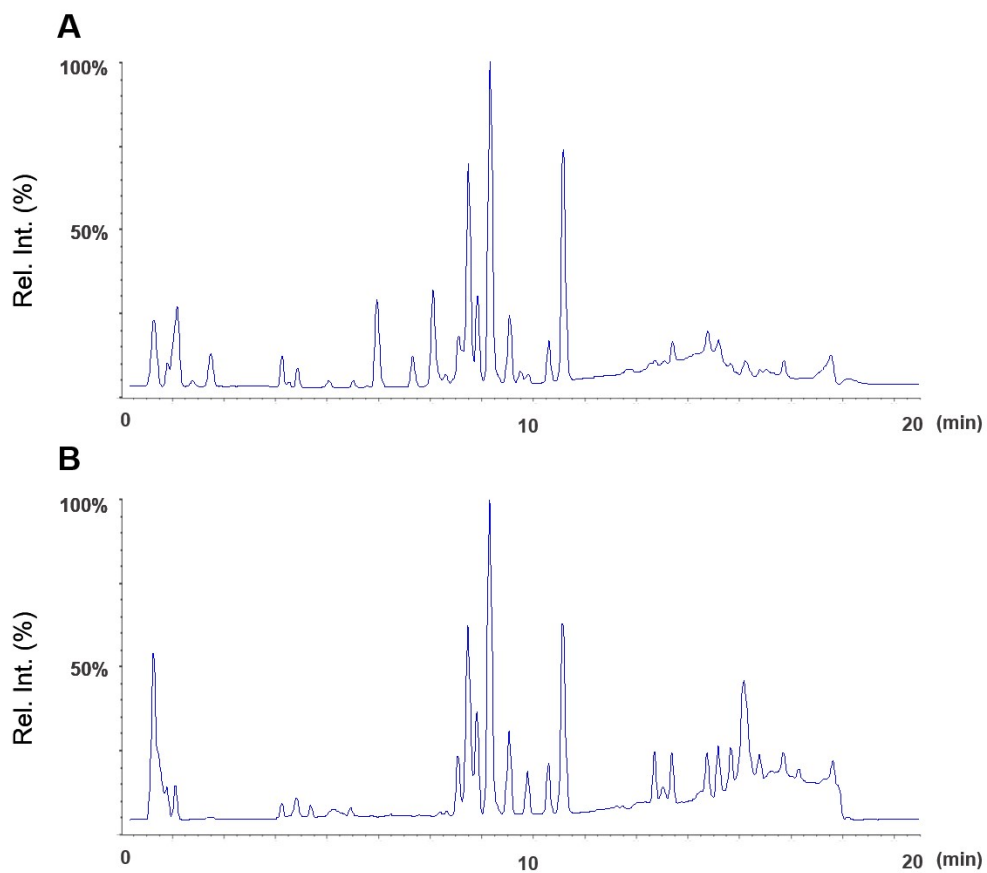

**Fig. S2.** Base peak ion (BPI) chromatograms of RIN as analyzed by UHPLC-QTOFMS. (A) BPI of UHPLC-QTOFMS in positive ion mode. (B) BPI of UHPLC-QTOFMS in negative ion mode.

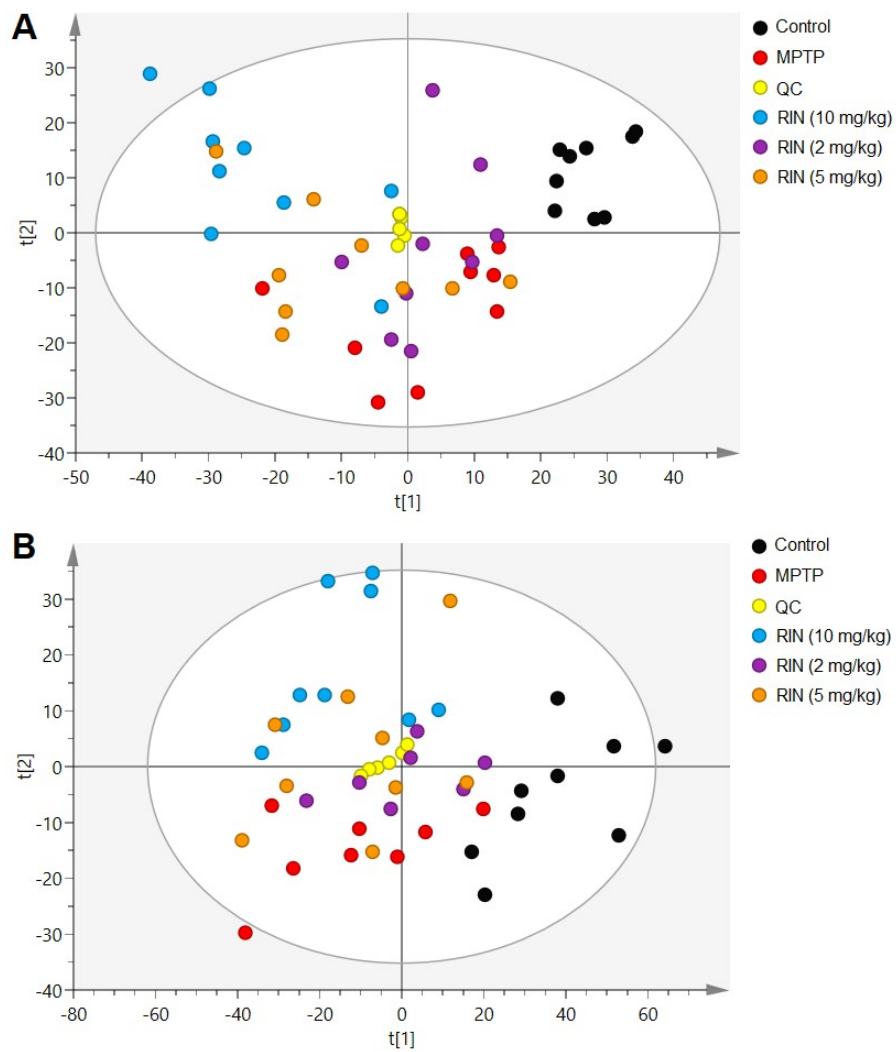

**Fig. S3.** Quality control of LC-MS methodologies. (A) PCA score plot of real samples and QC samples from positive ion mode LC-MS dataset. (B) PCA score plot of real samples and QC samples from negative ion mode LC-MS dataset.

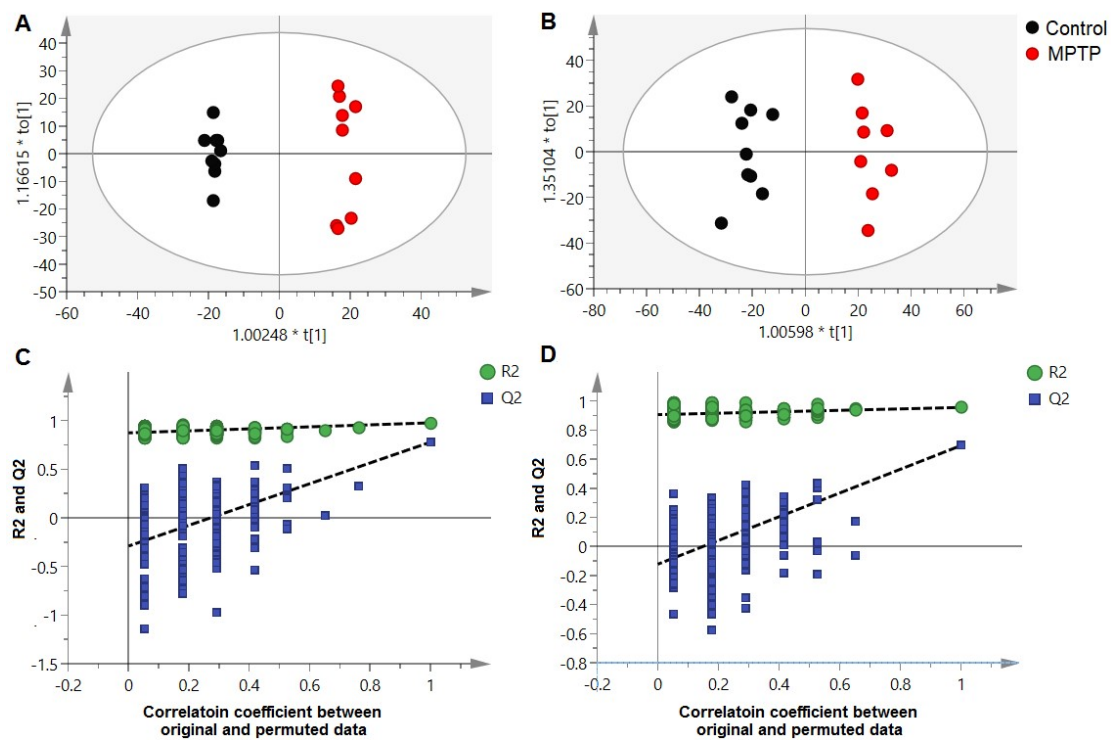

**Fig. S4.** The OPLS-DA scores plot from positive ion mode LC-MS (A) and negative ion mode LC-MS (B) dataset of control and MPTP groups. The quality was validated by 200 permutation tests (C) for positive ion mode LC-MS and (D) for negative ion mode LC-MS, respectively.

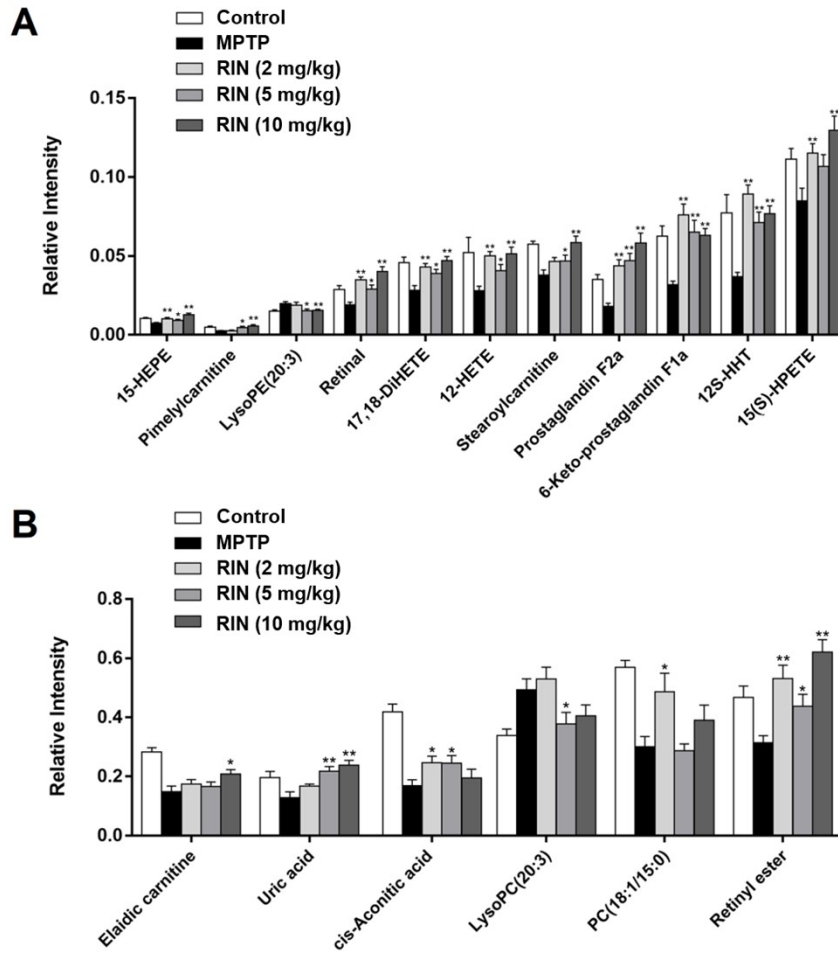

**Fig. S5.** Relative intensity of metabolites regulated by RIN. (Values are shown in Mean  $\pm$  SEM.

\* $p < 0.05$ , \*\* $p < 0.01$  vs MPTP group.)

## Supplemental Tables

**Table S1.** Sequences of primers used for quantitative real-time PCR.

| Gene           | Primer  | Sequence                |
|----------------|---------|-------------------------|
| NLRP3          | forward | ATTACCCGCCCGAGAAAGG     |
|                | reverse | TCGCAGCAAAGATCCACACAG   |
| TLR4           | forward | ATGGCATGGCTTACACCACC    |
|                | reverse | GAGGCCAATTTTGTCTCCACA   |
| COX2           | forward | TGCACTATGGTTACAAAAGCTGG |
|                | reverse | TCAGGAAGCTCCTTATTTCCCTT |
| $\beta$ -actin | forward | GGCTGTATTCCCCTCCATCG    |
|                | reverse | CCAGTTGGTAACAATGCCATGT  |

**Table S2.** Influence of RIN on neurobehavioral abnormalities in MPTP-treated mice.

|                       | Control         | MPTP                           | Madopar                        | RIN (2 mg/kg)                    | RIN (5 mg/kg)                     | RIN (10 mg/kg)                     |
|-----------------------|-----------------|--------------------------------|--------------------------------|----------------------------------|-----------------------------------|------------------------------------|
| Total time (s)        | 8.06±0.64       | 18.02±2.07 <sup>###</sup>      | 9.54±0.83 <sup>***</sup>       | 9.87±0.59 <sup>***#</sup>        | 9.29±0.92 <sup>***</sup>          | 8.32±1.84 <sup>***</sup>           |
| Residence time (s)    | 220.3±21.91     | 95.78±19.76 <sup>###</sup>     | 165.22±20.36 <sup>*#</sup>     | 170.56±27.8 <sup>*</sup>         | 169.56±22.48 <sup>*</sup>         | 177.88±29.76 <sup>*</sup>          |
| Total distance (mm)   | 14586.35±906.04 | 5385.08±1041.89 <sup>###</sup> | 9623.89±1509.63 <sup>###</sup> | 10237.1±1177.21 <sup>**###</sup> | 10543.42±682.83 <sup>***###</sup> | 10085.68±1057.56 <sup>***###</sup> |
| Central distance (mm) | 1660.41±223.94  | 612.3±189.00 <sup>#</sup>      | 1074.72±165.64 <sup>#</sup>    | 1272.15±275.46 <sup>*</sup>      | 1267.18±130.9 <sup>**</sup>       | 1314.89±233.44 <sup>*</sup>        |

Data are mean ± SEM. <sup>#</sup>*p* < 0.05, <sup>##</sup>*p* < 0.01, <sup>###</sup>*p* < 0.001 vs. control group; <sup>\*</sup>*p* < 0.05, <sup>\*\*</sup>*p* < 0.01, <sup>\*\*\*</sup>*p* < 0.001 vs. MPTP group.



**Table S3.** Representative photomicrographs of tyrosine hydroxylase (TH)-positive neurons in the substantia nigra and TH-positive fibers in the striatum.

|                  | Control    | MPTP                      | Madopar                  | RIN (2 mg/kg)           | RIN (5 mg/kg)            | RIN (10 mg/kg)          |
|------------------|------------|---------------------------|--------------------------|-------------------------|--------------------------|-------------------------|
| Substantia nigra | 56.16±3.63 | 36.81±2.13 <sup>#</sup>   | 43.54±1.12 <sup>*#</sup> | 41.46±1.08 <sup>#</sup> | 44.82±0.88 <sup>*#</sup> | 47.12±2.78 <sup>*</sup> |
| Striatum         | 47.07±1.82 | 27.66±1.12 <sup>###</sup> | 36.5±3.78                | 36.06±4.12              | 37.50±4.95               | 37.32±3.04 <sup>*</sup> |

Data are mean ± SEM. <sup>#</sup>*p* < 0.05, <sup>###</sup>*p* < 0.001 vs. control group; <sup>\*</sup>*p* < 0.05 vs. MPTP group.

**Table S4.** The serum levels of inflammatory cytokines (IL-1 $\beta$ , IL-6, IL-10 and TNF- $\alpha$ ) and oxidative stress indicators (SOD, GSH, LDH and MDA).

|                       | Control            | MPTP                              | Madopar                           | RIN (2 mg/kg)                     | RIN (5 mg/kg)                   | RIN (10 mg/kg)                   |
|-----------------------|--------------------|-----------------------------------|-----------------------------------|-----------------------------------|---------------------------------|----------------------------------|
| IL-1 $\beta$ (pg/mL)  | 46.78 $\pm$ 4.94   | 70.21 $\pm$ 4.15 <sup>##</sup>    | 55.53 $\pm$ 2.07 <sup>**</sup>    | 74.9 $\pm$ 6.11 <sup>##</sup>     | 54.37 $\pm$ 4.72 <sup>*</sup>   | 50.06 $\pm$ 5.16 <sup>**</sup>   |
| IL-6 (pg/mL)          | 55.8 $\pm$ 4.07    | 80.77 $\pm$ 4.06 <sup>###</sup>   | 61.99 $\pm$ 4.15 <sup>**</sup>    | 82.87 $\pm$ 2.33 <sup>###</sup>   | 66.39 $\pm$ 4.68 <sup>*</sup>   | 58.42 $\pm$ 3.68 <sup>***</sup>  |
| IL-10 (pg/mL)         | 276.04 $\pm$ 8.62  | 204.08 $\pm$ 13.07 <sup>###</sup> | 258.76 $\pm$ 12.52 <sup>**</sup>  | 204.7 $\pm$ 17.67 <sup>##</sup>   | 217.91 $\pm$ 13 <sup>##</sup>   | 247.92 $\pm$ 10.89 <sup>*</sup>  |
| TNF- $\alpha$ (pg/mL) | 280.12 $\pm$ 22.75 | 403.57 $\pm$ 19.1 <sup>###</sup>  | 284.18 $\pm$ 19.41 <sup>***</sup> | 408.93 $\pm$ 20.91 <sup>###</sup> | 343.19 $\pm$ 20.1 <sup>*</sup>  | 291.5 $\pm$ 18.65 <sup>***</sup> |
| SOD (ng/mL)           | 8.99 $\pm$ 0.28    | 6.3 $\pm$ 0.45 <sup>###</sup>     | 7.76 $\pm$ 0.47 <sup>*#</sup>     | 6.05 $\pm$ 0.46 <sup>###</sup>    | 7.02 $\pm$ 0.41 <sup>##</sup>   | 8.84 $\pm$ 0.34 <sup>***</sup>   |
| GSH (ng/mL)           | 5.3 $\pm$ 0.25     | 3.19 $\pm$ 0.19 <sup>###</sup>    | 4.52 $\pm$ 0.26 <sup>***</sup>    | 3.81 $\pm$ 0.25 <sup>*##</sup>    | 3.65 $\pm$ 0.18 <sup>###</sup>  | 4.6 $\pm$ 0.46 <sup>**</sup>     |
| LDH (ng/mL)           | 9.02 $\pm$ 0.66    | 13.48 $\pm$ 0.53 <sup>###</sup>   | 9.38 $\pm$ 0.63 <sup>***</sup>    | 13.04 $\pm$ 0.86 <sup>##</sup>    | 10.57 $\pm$ 0.46 <sup>***</sup> | 9.93 $\pm$ 0.49 <sup>***</sup>   |
| MDA (nmol/L)          | 11.19 $\pm$ 0.94   | 17.47 $\pm$ 0.94 <sup>###</sup>   | 11.31 $\pm$ 0.47 <sup>***</sup>   | 16.02 $\pm$ 0.99 <sup>##</sup>    | 13.46 $\pm$ 0.95 <sup>**</sup>  | 12.57 $\pm$ 0.94 <sup>**</sup>   |

Data are mean  $\pm$  SEM. # $p$  < 0.05, ## $p$  < 0.01, ### $p$  < 0.001 vs. control group; \* $p$  < 0.05, \*\* $p$  < 0.01, \*\*\* $p$  < 0.001 vs. MPTP group.

**Table S5.** Analyzed pathways of metabolomics data differently regulated in serum of MPTP-induced PD mice.

|                                            | Total <sup>a</sup> | Hits <sup>b</sup> | Raw p <sup>c</sup> | -LOG <sub>10</sub> (p) | FDR      | Impact |
|--------------------------------------------|--------------------|-------------------|--------------------|------------------------|----------|--------|
| Synthesis and degradation of ketone bodies | 5                  | 2                 | 3.01E-03           | 2.52                   | 4.82E-03 | 0.60   |
| Retinol metabolism                         | 16                 | 2                 | 1.71E-02           | 1.77                   | 1.95E-02 | 0.41   |
| Glycine, serine and threonine metabolism   | 34                 | 1                 | 5.57E-04           | 3.25                   | 1.48E-03 | 0.27   |
| Glyoxylate and dicarboxylate metabolism    | 32                 | 3                 | 2.01E-03           | 2.70                   | 4.05E-03 | 0.16   |
| Glycerophospholipid metabolism             | 36                 | 3                 | 9.34E-06           | 5.03                   | 5.99E-05 | 0.16   |
| Citrate cycle (TCA cycle)                  | 20                 | 2                 | 2.03E-03           | 2.69                   | 4.05E-03 | 0.14   |
| Butanoate metabolism                       | 15                 | 2                 | 3.01E-03           | 2.52                   | 4.82E-03 | 0.11   |
| Glutathione metabolism                     | 28                 | 1                 | 5.57E-04           | 3.25                   | 1.48E-03 | 0.09   |
| Phosphatidylinositol signaling system      | 28                 | 1                 | 7.76E-03           | 2.11                   | 9.80E-03 | 0.03   |
| Inositol phosphate metabolism              | 30                 | 1                 | 7.76E-03           | 2.11                   | 9.80E-03 | 0.03   |
| Primary bile acid biosynthesis             | 46                 | 1                 | 5.57E-04           | 3.25                   | 1.48E-03 | 0.02   |
| Arachidonic acid metabolism                | 36                 | 5                 | 4.19E-06           | 5.38                   | 5.99E-05 | 0.02   |
| Purine metabolism                          | 66                 | 1                 | 2.15E-02           | 1.67                   | 2.24E-02 | 0.02   |
| Tyrosine metabolism                        | 42                 | 2                 | 1.29E-03           | 2.89                   | 3.11E-03 | 0.01   |

<sup>a</sup> Total is the total number of compounds in the pathway; <sup>b</sup> the hits is the actually matched number from the user uploaded data; <sup>c</sup> the p is the original p value calculated from the enrichment analysis; <sup>d</sup> the impact is the pathway impact value calculated from pathway topology analysis.

**Table S6.** Analyzed pathways of metabolomics data differently regulated in serum of RIN-treated mice compared with model mice.

|                                         | Total <sup>a</sup> | Hits <sup>b</sup> | Raw p <sup>c</sup> | -LOG <sub>10</sub> (p) | FDR  | Impact |
|-----------------------------------------|--------------------|-------------------|--------------------|------------------------|------|--------|
| Retinol metabolism                      | 16                 | 2                 | 0.00               | 4.50                   | 0.00 | 0.41   |
| Glycerophospholipid metabolism          | 36                 | 2                 | 0.01               | 2.01                   | 0.02 | 0.11   |
| Citrate cycle (TCA cycle)               | 20                 | 1                 | 0.06               | 1.20                   | 0.06 | 0.05   |
| Glyoxylate and dicarboxylate metabolism | 32                 | 1                 | 0.06               | 1.20                   | 0.06 | 0.02   |
| Arachidonic acid metabolism             | 36                 | 5                 | 0.00               | 2.99                   | 0.00 | 0.02   |
| Purine metabolism                       | 66                 | 1                 | 0.00               | 3.25                   | 0.00 | 0.02   |

<sup>a</sup>Total is the total number of compounds in the pathway; <sup>b</sup> the hits is the actually matched number from the user uploaded data; <sup>c</sup> the p is the original p value calculated from the enrichment analysis; <sup>d</sup> the impact is the pathway impact value calculated from pathway topology analysis.
